# Supplementary material for: Injury patterns and circumstances associated with electric scooter collisions: a scoping review
Source: PubMed Central journal article supplement — Inj Prev. 2021 Mar 11;27(5):490–9. doi: 10.1136/injuryprev-2020-044085 (PMC8461400; doi:10.1136/injuryprev-2020-044085), 2021-03-11
Supplement: injuryprev-2020-044085supp001.pdf [file injuryprev-2020-044085supp001.pdf]

**SUPPLEMENTARY MATERIAL****Table 6.** Three concepts used for the systematic literature search and corresponding search terms

| <b>Concept</b>   | <b>Search Terms</b>                                                                                    |
|------------------|--------------------------------------------------------------------------------------------------------|
| Electric scooter | Scooter, micromobility, personal mobility                                                              |
| Injury           | Injury, wound, trauma, fracture, laceration, burn, hospital, emergency service                         |
| Circumstances    | Accident, traffic accident, fall, motor vehicle collision, motor vehicle incident, motor vehicle crash |

**Table 7.** Sample Search Strategy

| Search Number        | <i>Scooter</i>                                                    | Number of Results |
|----------------------|-------------------------------------------------------------------|-------------------|
| 1                    | Scooter.mp                                                        | 352               |
| 2                    | Micromobility.mp                                                  | 25                |
| 3                    | Personal mobility.mp                                              | 271               |
| <b>4</b>             | <b>1 or 2 or 3</b>                                                | <b>622</b>        |
| <i>Injuries</i>      |                                                                   |                   |
| 5                    | Exp Wounds and Injuries/ or injury.mp                             | 1380006           |
| 6                    | Trauma.mp or multitrauma.mp                                       | 262510            |
| 7                    | Fracture.mp                                                       | 204312            |
| 8                    | Laceration.mp                                                     | 7531              |
| 9                    | Burn.mp                                                           | 37308             |
| 10                   | Exp Hospitals/ or hospital.mp                                     | 1328688           |
| 11                   | Exp Emergency Service, Hospital/ or emergency department.mp       | 123100            |
| <b>12</b>            | <b>5 or 6 or 7 or 8 or 9 or 10 or 11</b>                          | <b>2794178</b>    |
| <i>Circumstances</i> |                                                                   |                   |
| 13                   | Exp Accidents/ or accident.mp or incident.mp                      | 188278            |
| 14                   | Exp Accidents, Traffic/ or traffic accident.mp                    | 45423             |
| 15                   | Exp Accidental Falls/ or fall.mp                                  | 130142            |
| 16                   | Motor vehicle collision.mp                                        | 910               |
| 17                   | Motor vehicle incident.mp                                         | 3                 |
| 18                   | Motor vehicle crash.mp                                            | 1260              |
| 19                   | 13 or 14 or 15 or 16 or 17 or 18                                  | 174051            |
| <b>20</b>            | <b>Scooter and (Injuries or Circumstances)<br/>4 and 12 OR 19</b> | <b>293</b>        |
